# Supplementary material for: Theoretical study of a highly fault-tolerant and scalable adaptive radiative cooler
Source: publisher site journal article supplement (doi:10.1515/nanoph-2023-0739), 2024-02-10
Supplement: Supplementary file [file j_nanoph-2023-0739_suppl_001.pdf]

## Support information

### Theoretical study of a highly fault-tolerant and scalable adaptive radiative cooler

Bin Li, <sup>a</sup> Jiaqi Hu, <sup>a</sup> Changhao Chen, <sup>a</sup> Hengren Hu, <sup>a</sup> Yetao Zhong, <sup>a</sup> Ruichen Song, <sup>a</sup>  
Yunqi Peng, <sup>a</sup> Xusheng Xia, <sup>a</sup> Kai Chen <sup>b</sup> and Zhilin Xia,<sup>a,\*</sup>

<sup>a</sup>Wuhan University of Technology, State Key Laboratory of Silicate Materials for  
Architectures, Wuhan, China

<sup>b</sup>Wuhan Zhongyuan Huadian Science and Technology Co., Ltd., Wuhan, China

\*Corresponding author's e-mail: xiazhiiln@whut.edu.cn

#### Supplement 1. Refractive index $n$ and extinction coefficient $k$ of the material

##### (1) Optical constants of POE

The relative dielectric function of the medium in the presence of light absorption  
is<sup>1</sup>

$$\varepsilon(\omega) = \varepsilon_1(\omega) + i\varepsilon_2(\omega)$$

where  $\varepsilon_1(\omega)$  is the real part of the relative dielectric function and  $\varepsilon_2(\omega)$  is the  
imaginary part of the relative dielectric function.

Complex refractive index of the absorbing medium<sup>2</sup>:

$$\tilde{n}(\omega) = n(\omega) + ik(\omega)$$

where the real part  $n(\omega)$  of the complex refractive index is the usually measured  
refractive index and the imaginary part  $k(\omega)$  is the extinction coefficient.

The relationship between the complex refractive index and the complex relative  
dielectric function of the medium is given by:

$$[n(\omega) + ik(\omega)]^2 = \varepsilon_1(\omega) + i\varepsilon_2(\omega)$$

From the separate equality of the real and imaginary parts, we get

$$n(\omega)^2 - k(\omega)^2 = \varepsilon_1(\omega)$$

$$2n(\omega)k(\omega) = \varepsilon_2(\omega)$$

Using the above relations<sup>3</sup>, through the dielectric constant and dissipation factor  
of POE, we obtained the refractive index  $n$  (1.48) and extinction coefficient  $k$  (0.004)  
of POE. Optical constants for Ag from Ref<sup>4</sup>.

##### (2) Optical constants of W-VO<sub>2</sub>

VO<sub>2</sub> is a typical phase transition material with its phase transition temperature near  
68°C. The lattice distortion of vanadium dioxide can be fundamentally induced by a  
small amount of tungsten doping, which reduces its phase transition temperature and  
adjusts it to near room temperature<sup>5-7</sup>. Meanwhile, doping W hardly changes the optical  
properties of VO<sub>2</sub> before and after the phase transition. Because the amount of tungsten  
doping is relatively small, it has essentially no effect on the material's dielectric  
constant<sup>8, 9</sup>. Therefore, in this paper, we use the optical constants of VO<sub>2</sub> as an  
approximate substitute for the optical constants of W-VO<sub>2</sub> in our calculations.

The optical constants of VO<sub>2</sub> were calculated from the literature<sup>10, 11</sup> using the

same method as Fan et al<sup>12</sup>:

$$\varepsilon(\omega) = \varepsilon_{\infty} + \frac{(\varepsilon_s - \varepsilon_{\infty}) \cdot \omega_t^2}{\omega_t^2 - \omega^2 + i\Gamma_0 \cdot \omega} + \sum_{j=1}^n \frac{f_j \cdot \omega_{oj}^2}{\omega_{oj}^2 - \omega^2 + i\gamma_j \cdot \omega} + \frac{\omega_p^2}{-\omega^2 + i\Gamma_d \cdot \omega}$$

The specific parameters for calculating the optical constants are:

|                     | $\varepsilon_{\infty}$ | $\varepsilon_s$ | $\omega_t$ | $\Gamma_0$ | $\omega_p$ | $\Gamma_d$ |
|---------------------|------------------------|-----------------|------------|------------|------------|------------|
| VO <sub>2</sub> (M) | 0.47                   | 2.64            | 0.89 eV    | 1.21 eV    | 0          | 0          |
| VO <sub>2</sub> (I) | 2.95                   | -13.90          | 0.86 eV    | 3.75 eV    | 4.47 eV    | 0.82 eV    |

### (3) Optical constants of POE+ W-VO<sub>2</sub>

Based on the equivalent medium theory, the effective dielectric constant of the 3D random medium is  $\varepsilon_{eff} = \frac{\sum \varepsilon_i V_i}{\sum V_i}$ , where  $V_i$  is the volume of the ith medium<sup>13</sup>. We calculate the refractive index  $n$  and the extinction coefficient  $k$  of the POE+W-VO<sub>2</sub> layer. The effective refractive index  $n$  of the hybrid layer is  $n_{VO_2(W)} \times V_1 + n_{POE} \times V_2$ . The effective extinction coefficient  $k$  of the hybrid layer is  $k_{VO_2(W)} \times V_1 + k_{POE} \times V_2$ , where  $V_1$  and  $V_2$  are the volume fractions of W-VO<sub>2</sub> and POE in the hybrid layer, respectively.

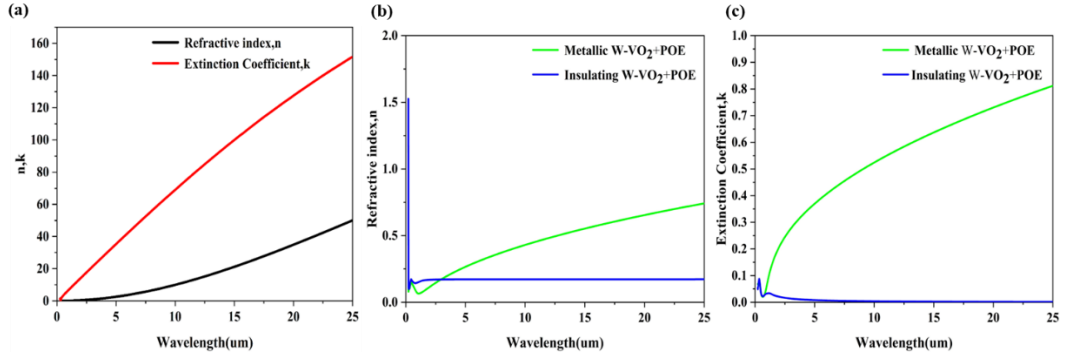

Figure S1. refractive index  $n$  and extinction coefficient  $k$  of the materials. (a) Refractive index  $n$  and extinction coefficient  $k$  of Ag; (b) refractive index  $n$  of POE+ W-VO<sub>2</sub> hybrid layer at high and low temperatures; (c) extinction coefficient  $k$  of POE+ W-VO<sub>2</sub> hybrid layer at high and low temperatures.

## Supplement 2. Effect of Volume Ratio on Adaptive Radiative Coolers

The thickness of the POE layer in the F-P resonance cavity was set to 600 nm, and the thickness of the hybrid layer was set to 1  $\mu m$ . The effects of different mixing ratios of W-VO<sub>2</sub> and POE in the mixed layer on the optical performance of the radiative cooler were investigated.

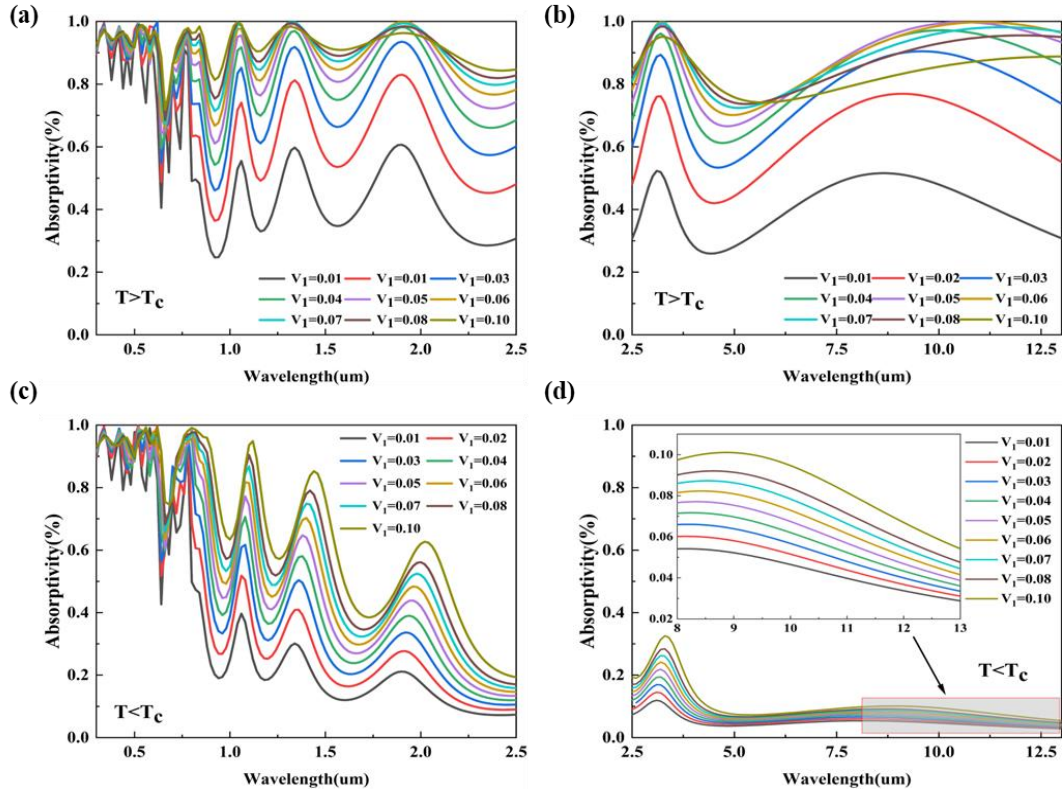

Figure S2 Effect of W-VO<sub>2</sub> volume occupancy on the optical performance of adaptive radiative coolers. (a) Absorbance of the radiative cooler in the visible-near-infrared (V-NIR) band when W-VO<sub>2</sub> is in the metallic state; (b) Absorbance of the radiative cooler in the mid-infrared (MIR) band when VO<sub>2</sub> is in the metallic state; (c) Absorbance of the radiative cooler in the visible-near-infrared (V-NIR) band when W-VO<sub>2</sub> is in the insulating state; (d) Absorbance of the radiative cooler in the mid-infrared (MIR) band when W-VO<sub>2</sub> is in the insulating state.

### Supplement 3. Effect of Mixed Layer Thickness on Adaptive Radiant Coolers

The thickness of the POE layer in the F-P resonant cavity is set to be 600 nm, and the volume share of W-VO<sub>2</sub> in the hybrid layer is set to be 0.05 constant. The effect of the hybrid layer thickness on the optical performance of the adaptive radiative cooler was explored.

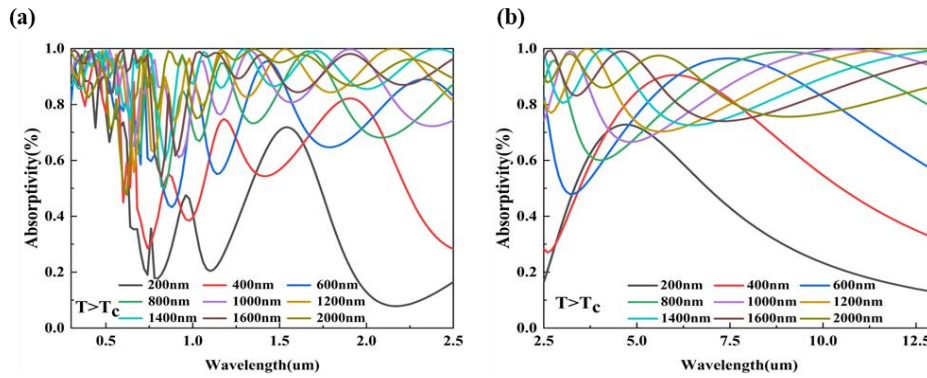

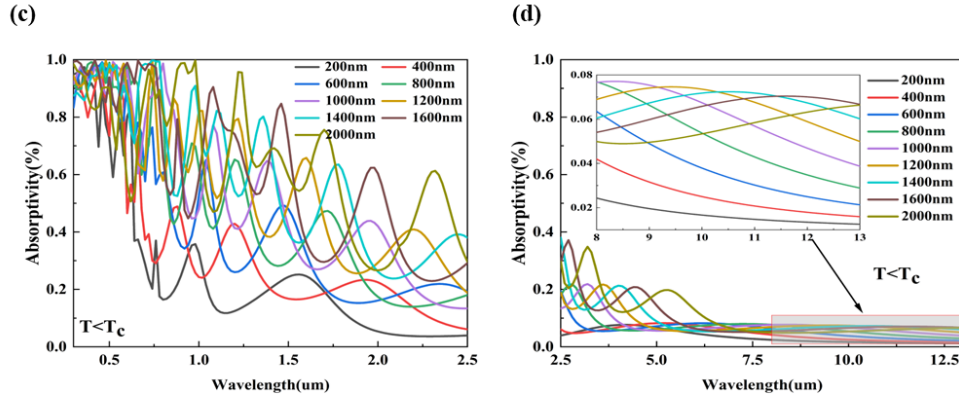

Figure S3 Effect of mixing layer thickness on the performance of adaptive radiative cooler (a) Absorption rate of the radiative cooler in the visible-near infrared (V-NIR) band when W-VO<sub>2</sub> is in the metallic state; (b) Absorption rate of the radiative cooler in the mid-infrared (MIR) band when W-VO<sub>2</sub> is in the metallic state; (c) Absorption rate of the radiative cooler in the visible-near infrared (V-NIR) band when W-VO<sub>2</sub> is in the insulating state; and (d) Absorption rate of the radiative cooler in the mid-infrared (MIR) band when W-VO<sub>2</sub> is in the insulating state.

#### Supplement 4. Effect of spacer thickness on adaptive radiant coolers

The volume percentage of W-VO<sub>2</sub> in the hybrid layer was set to 0.05, and the thickness of the hybrid layer was kept constant at 1 um. The effect of the thickness of the POE spacer layer on the optical performance of the radiant cooler was explored.

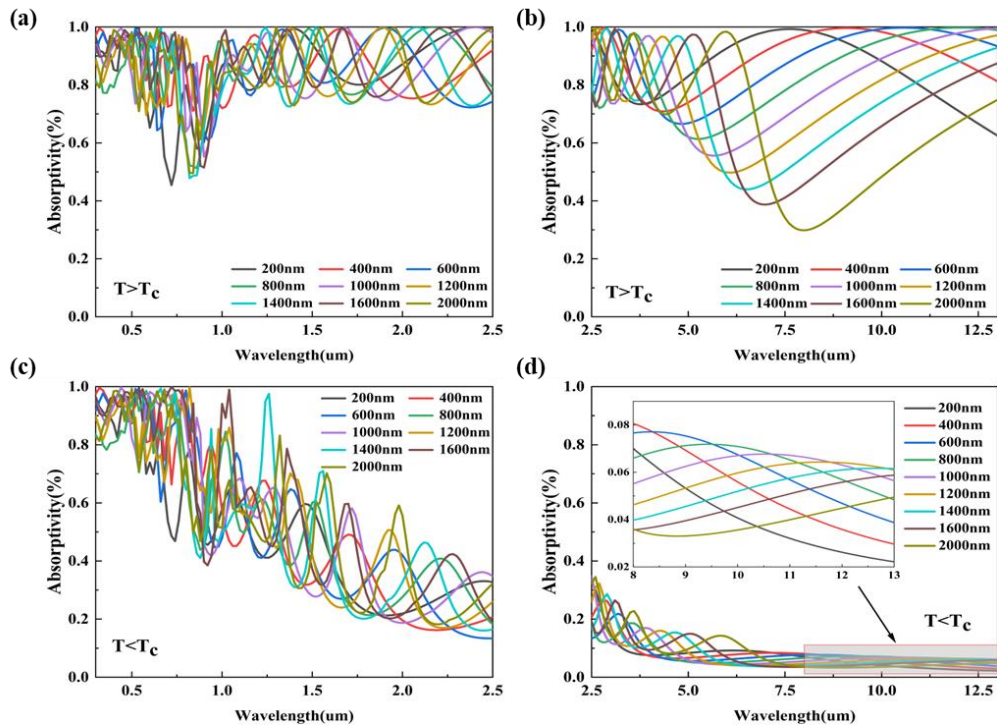

Figure S4 Effect of spacer layer POE thickness on the performance of adaptive radiative cooler (a) Absorption rate of the radiative cooler in the visible-near infrared (V-NIR) band when W-VO<sub>2</sub> is in the metallic state; (b) Absorption rate of the radiative cooler in the mid-infrared (MIR) band when W-VO<sub>2</sub> is in the metallic state; (c) Absorption rate of the radiative cooler in the visible-near infrared (V-NIR) band when W-VO<sub>2</sub> is in the insulating state; and (d) Absorption rate of the radiative cooler in the mid-infrared (MIR) band when W-VO<sub>2</sub> is in the insulating state.

### Supplement 5. Average emissivity

According to Kirchhoff's law, the spectral emissivity  $\varepsilon$  is equal to the spectral absorptivity under thermal equilibrium conditions. Therefore, for opaque materials, the spectral emissivity  $\varepsilon(\lambda)$  can be expressed as<sup>14, 15</sup>:

$$\varepsilon(\lambda) = \alpha(\lambda) = 1 - R(\lambda)$$

where  $R(\lambda)$  is the spectral reflectance.

The formula is then used to integrate the spectral emissivity  $\varepsilon$  over the blackbody radiation spectrum to obtain the average emissivity  $\varepsilon$ :

$$\varepsilon = \frac{\int_{\lambda_1}^{\lambda_2} (1 - R(\lambda)) B(\lambda, T) d\lambda}{\int_{\lambda_1}^{\lambda_2} B(\lambda, T) d\lambda}$$

where  $B(\lambda, T)$  is the blackbody radiation at a temperature of  $T$ .

### Supplement 6. Calculation of radiative cooling performance

In order to further demonstrate the effectiveness of the adaptive radiative cooler, the net radiative cooling power has been calculated at both high and low temperatures. Generally, a radiative cooler's net radiative cooling power can be defined as follows<sup>16</sup>.

$$Q_{net} = Q_{rad} - Q_{atm} - Q_{nonrad} - Q_{sun} \quad (1)$$

Where  $Q_{sun}$  is the solar radiation power absorbed by the radiant cooler,  $Q_{sun} = P_{sun} \cdot \varepsilon_1$  during the daytime,  $\varepsilon_1$  is the solar absorption rate, and it is assumed that  $Q_{sun} = 1000 \text{ W/m}^2$  during the daytime and  $Q_{sun} = 0$  during the nighttime.

where the radiant power  $Q_{rad}$  emitted by the radiator is

$$Q_{rad} = 2\pi \int_0^{\frac{\pi}{2}} \sin\theta \cos\theta d\theta \int_0^{\infty} U_B(T_r, \lambda) e_r(\lambda, \theta) d\lambda \quad (2)$$

The atmospheric radiant power  $Q_{atm}$  absorbed by the radiator is

$$Q_{atm} = 2\pi \int_0^{\frac{\pi}{2}} \sin\theta \cos\theta d\theta \int_0^{\infty} U_B(T_a, \lambda) e_r(\lambda, \theta) e_a(\lambda, \theta) d\lambda \quad (3)$$

Here,  $U_B(T, \lambda) = \frac{2hc^2}{\lambda^5} \frac{1}{e^{hc/\lambda k_B T} - 1}$  is the intensity of the spectral radiation of the blackbody at temperature  $T$ , where  $h$  is Planck's constant,  $k_B$  is Boltzmann's constant,  $c$  is the speed of light in vacuum, and  $\lambda$  is the wavelength. According to Kirchhoff's law, the emissivity of a radiator can be determined by its absorptivity  $e_r(\lambda, \theta)$ , and  $e_a(\lambda, \theta)$  is the atmospheric emissivity with respect to the angle. The absorptivity is determined by the angle-dependent atmospheric emissivity,  $e_a(\lambda, \theta) = 1 - t(\lambda)^{1/\cos\theta}$ , where  $t(\lambda)$  is the atmospheric transmittance in the zenith direction.  $T_r$  is the temperature of the radiator and  $T_a$  is the ambient temperature<sup>17</sup>.

The non-radiative (conduction + convection) heat transfer from the radiator to the surroundings can be defined as

$$Q_{nonrad} = h_c(T_{amb} - T_r) \quad (4)$$

Where,  $h_c$  is the sum of non-radiant heat coefficients resulting from heat transfer and convective heat exchange between the radiator and the surroundings. It is expressed as:  $h_c = h_{cond} + h_{conv}$ . The cooling temperature is calculated with  $Q_{net} = 0$ .

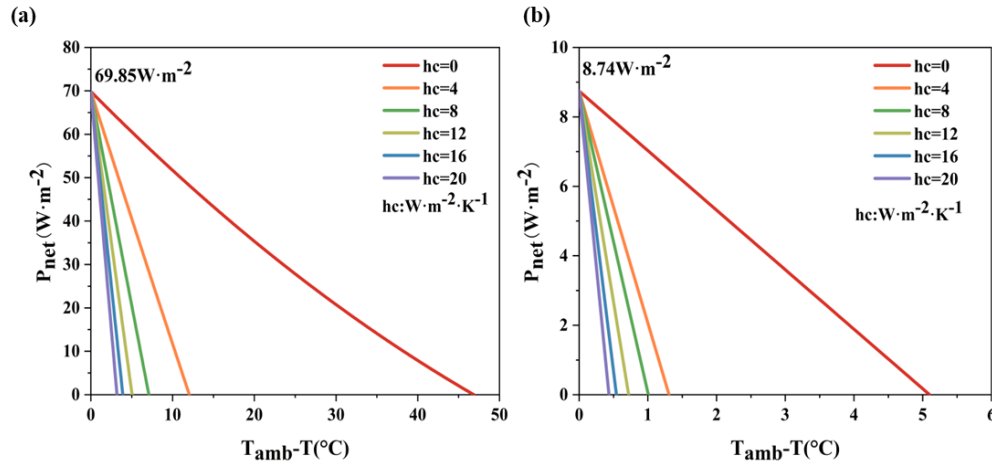

Figure S5. The cooling effect of the adaptive radiative cooling system under different conditions: (a) variation of the net radiative cooling power with convection coefficient for the adaptive device during the daytime (high temperature); (b) variation of the net radiative cooling power with convection coefficient for the adaptive device during the nighttime (low temperature ).

## References

1. G. Ghosh, "Dispersion-equation coefficients for the refractive index and birefringence of calcite and quartz crystals," *Optics Communications* **163** (1), 95-102 (1999).
2. G. Kresse and J. Hafner, "Ab initio molecular dynamics for liquid metals," *Physical Review B* **47** (1), 558-561 (1993).
3. H. P. Zhao et al., "Passive radiative temperature regulator: Principles and absorption-emission manipulation," *Solar Energy Materials and Solar Cells* **229**, 9 (2021).
4. H. U. Yang et al., "Optical dielectric function of silver," *Physical Review B* **91** (23), 235137 (2015).
5. R. Shi et al., "Phase management in single-crystalline vanadium dioxide beams," *Nature Communications* **12** (1), 9 (2021).
6. X. G. Tan et al., "Unraveling Metal-insulator Transition Mechanism of VO<sub>2</sub> Triggered by Tungsten Doping," *Sci Rep* **2**, 6 (2012).
7. J. M. Booth and P. S. Casey, "Anisotropic Structure Deformation in the VO<sub>2</sub> Metal-Insulator Transition," *Physical Review Letters* **103** (8), 4 (2009).
8. S. L. Dou et al., "A facile method for the preparation of W-doped VO<sub>2</sub> films with lowered phase transition temperature, narrowed hysteresis loops and excellent cycle stability," *Mater. Chem. Phys.* **215**, 91-98 (2018).
9. B. G. Chae and H. T. Kim, "Effects of W doping on the metal-insulator transition in vanadium dioxide film," *Physica B: Condensed Matter* **405** (2), 663-667 (2010).



138 10. J. B. K. Kana et al., "Thermally driven sign switch of static dielectric constant of VO<sub>2</sub> thin  
139 film," *Opt. Mater.* **54**, 165-169 (2016).

140 11. M. M. Qazilbash et al., "Infrared spectroscopy and nano-imaging of the insulator-to-metal  
141 transition in vanadium dioxide," *Physical Review B* **79** (7), 10 (2009).

142 12. M. Ono et al., "Self-adaptive radiative cooling based on phase change materials," *Optics*  
143 *Express* **26** (18), A777-A787 (2018).

144 13. S. R. Liang et al., "Tunable smart mid infrared thermal control emitter based on phase  
145 change material VO<sub>2</sub> thin film," *Applied Thermal Engineering* **232**, 8 (2023).

146 14. A. Hendaoui et al., "VO<sub>2</sub>-based smart coatings with improved emittance-switching  
147 properties for an energy-efficient near room-temperature thermal control of spacecrafts,"  
148 *Solar Energy Materials and Solar Cells* **117**, 494-498 (2013).

149 15. E. A. Goldstein, A. P. Raman and S. H. Fan, "Sub-ambient non-evaporative fluid cooling  
150 with the sky," *Nature Energy* **2** (9), 7 (2017).

151 16. M. M. Hossain and M. Gu, "Radiative Cooling: Principles, Progress, and Potentials,"  
152 *Advanced Science* **3** (7), 10 (2016).

153 17. Z. B. Yang and J. Zhang, "Bioinspired Radiative Cooling Structure with Randomly Stacked  
154 Fibers for Efficient All-Day Passive Cooling," *Acs Applied Materials & Interfaces* **13** (36),  
155 43387-43395 (2021).

156
